# Supplementary material for: A folate-integrated magnetic polymer micelle for MRI and dual targeted drug delivery
Source: Royal Society of Chemistry journal article supplement (doi:10.1039/c4nr02484b), 2014-07-07
Supplement: c4nr02484b1.pdf [file c4nr02484b1.pdf]

## Electronic Supplementary Information

### Folate-integrated magnetic polymer micelle for MRI and dual targeted drug delivery

Lijiao Ao, Bi Wang, Peng Liu, Liang Huang, Caixia Yue, Duyang Gao, Chunlei Wu, Wu Su\*

Guangdong Key Laboratory of Nanomedicine, Institute of Biomedicine and Biotechnology, Shenzhen Institutes of Advanced Technology, Chinese Academy of Sciences, Shenzhen 518055, China. E-mail: wu.su@siat.ac.cn; Fax: +86-755-86585222; Tel: +86-755-86585203

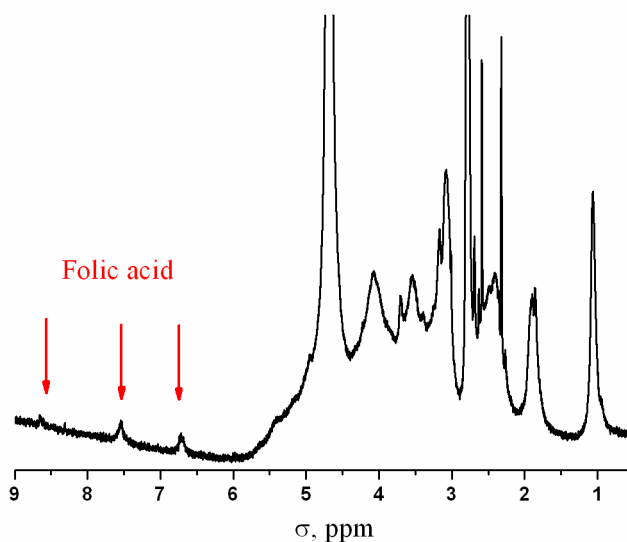

Fig. S1 <sup>1</sup>H-NMR spectrum of heparin-folic acid conjugate in D<sub>2</sub>O.

The folic acid grafted on heparin could be identified by the peaks (marked by red arrows) as reported in previous literatures <sup>1,2</sup>

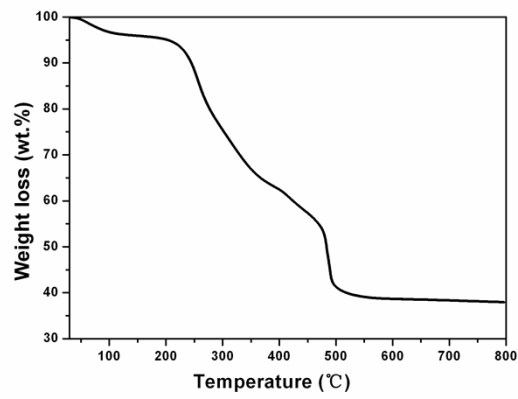

Fig. S2 TGA measure of HF-SPION from 25°C to 800°C at a heating rate of 10°C/min in air atmosphere.

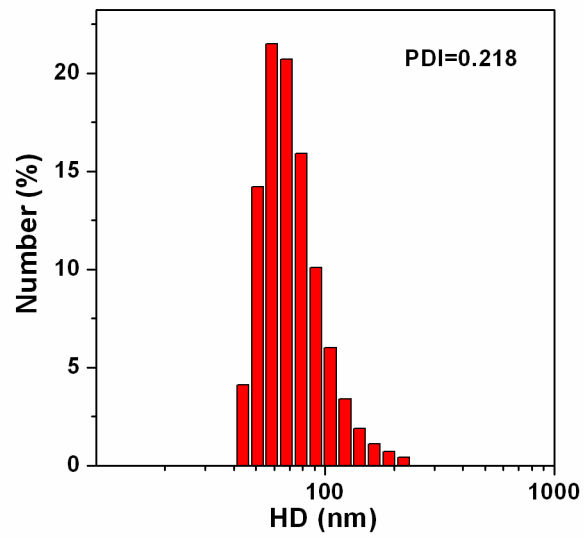

Fig. S3 Size distribution of HF-SPION-DOX measured by dynamic light scattering (DLS).

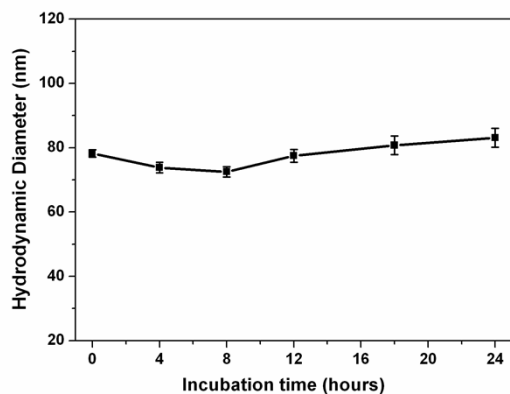

Fig. S4 Hydrodynamic diameters of HF-SPION-DOX in mouse blood serum during 24 h incubation at 37°C.

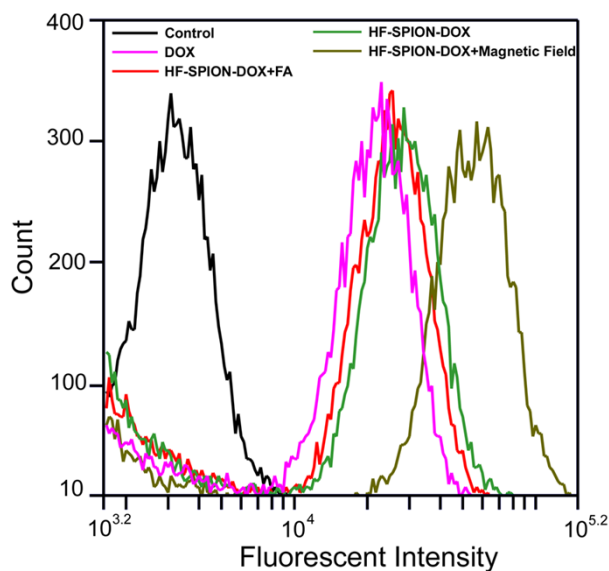

Fig. S5 Flow cytometric analysis of controlled MCF-7 cells and MCF-7 cells treated with free DOX, HF-SPION-DOX with FA, HF-SPION-DOX and HF-SPION-DOX under an external magnetic field at DOX concentration of 5  $\mu\text{g/mL}$  for 0.5h (left to right).

## References

- (1) X. Wang, J. Li, Y. Q. Wang, K. J. Cho, G. Kim, A. Gjyzezi, L. K. P. Giannakakou, H. J. C. Shin, M. Tighiouart, S. M. Nie, Z. Chen and D. M. Shin, *ACS Nano*, 2009, **3**, 3165-3174.
- (2) C. X. Yue, P. Liu, M. B. Zheng, P. F. Zhao, Y. Q. Wang, Y. F. Ma, L. T. Cai, *Biomaterials*, 2013, **34**, 6853-6861.
